# Supplementary material for: Morphology of Meibomian Glands in a 65-Year-Old Norwegian Population without Dry Eye Disease
Source: MDPI journal article supplement (doi:10.3390/jcm11030527), 2022-01-20
Supplement: s1 [file s1]

**Table S1.** Correlation between meibomian gland morphology and clinical dry eye tests.

|                           |          | OSDI   | Osmolarity | TFBUT   | OSS     | Schirmer I | ME     | MQ     | LMA    |
|---------------------------|----------|--------|------------|---------|---------|------------|--------|--------|--------|
| Precent dropout_UL        | <i>r</i> | -0.051 | 0.094      | -0.137  | .246*   | -0.126     | 0.002  | -0.025 | 0.147  |
|                           | <i>p</i> | 0.603  | 0.537      | 0.172   | 0.012   | 0.203      | 0.988  | 0.802  | 0.135  |
| Percent dropout_LL        | <i>r</i> | -0.153 | -.353*     | 0.011   | -0.047  | -.206*     | -0.026 | 0.026  | -0.088 |
|                           | <i>p</i> | 0.102  | 0.011      | 0.905   | 0.621   | 0.029      | 0.783  | 0.786  | 0.348  |
| Percent dropout_middle_UL | <i>r</i> | 0.007  | 0.202      | 0.054   | 0.132   | -0.071     | -0.03  | -0.011 | 0.034  |
|                           | <i>p</i> | 0.942  | 0.177      | 0.593   | 0.18    | 0.476      | 0.761  | 0.913  | 0.729  |
| Percent dropout_middle_LL | <i>r</i> | -0.091 | -0.197     | 0.139   | 0.013   | -0.09      | -0.133 | 0.072  | -0.084 |
|                           | <i>p</i> | 0.334  | 0.165      | 0.145   | 0.889   | 0.34       | 0.158  | 0.448  | 0.37   |
| Number of glands_UL       | <i>r</i> | -0.006 | -.328*     | 0.165   | -.255** | 0.051      | 0.033  | -0.025 | -0.141 |
|                           | <i>p</i> | 0.952  | 0.026      | 0.099   | 0.009   | 0.606      | 0.737  | 0.798  | 0.153  |
| Number of glands_LL       | <i>r</i> | -0.183 | -0.177     | -.254** | -0.027  | -0.004     | .255** | -.193* | 0.01   |
|                           | <i>p</i> | 0.05   | 0.214      | 0.007   | 0.773   | 0.968      | 0.006  | 0.04   | 0.916  |
| Distorted glands_UL       | <i>r</i> | 0.059  | 0.054      | 0.006   | -0.025  | 0.074      | 0.15   | -0.177 | -0.106 |
|                           | <i>p</i> | 0.55   | 0.723      | 0.955   | 0.803   | 0.459      | 0.128  | 0.072  | 0.284  |
| Distorted glands_LL       | <i>r</i> | 0.102  | -0.097     | -0.1    | -0.076  | 0.006      | -0.003 | 0.103  | -0.055 |
|                           | <i>p</i> | 0.28   | 0.498      | 0.297   | 0.417   | 0.95       | 0.975  | 0.278  | 0.562  |
| Tortuous glands_UL        | <i>r</i> | -0.028 | -0.033     | 0.152   | -.312** | 0.022      | -.206* | 0.074  | -0.049 |
|                           | <i>p</i> | 0.776  | 0.828      | 0.129   | 0.001   | 0.828      | 0.036  | 0.453  | 0.62   |
| Tortuous glands_LL        | <i>r</i> | .213*  | 0.17       | 0.092   | -.199*  | 0.099      | -0.023 | 0.027  | -0.08  |
|                           | <i>p</i> | 0.022  | 0.233      | 0.335   | 0.033   | 0.297      | 0.804  | 0.773  | 0.397  |
| Hooked glands_UL          | <i>r</i> | -0.035 | -0.054     | -0.032  | -0.092  | -0.098     | -0.127 | 0.087  | 0.184  |
|                           | <i>p</i> | 0.72   | 0.72       | 0.748   | 0.353   | 0.324      | 0.2    | 0.38   | 0.061  |
| Hooked glands_LL          | <i>r</i> | -0.038 | 0.019      | -0.019  | 0.047   | 0.043      | -0.048 | 0.125  | 0.003  |
|                           | <i>p</i> | 0.688  | 0.895      | 0.84    | 0.62    | 0.653      | 0.612  | 0.185  | 0.973  |
| Dropout glands_UL         | <i>r</i> | -.196* | -0.031     | -0.114  | 0.086   | -0.185     | 0.109  | -0.04  | -0.087 |

|                               |          |        |        |        |         |        |        |        |        |
|-------------------------------|----------|--------|--------|--------|---------|--------|--------|--------|--------|
| Dropout glands_LL             | <i>p</i> | 0.046  | 0.838  | 0.255  | 0.381   | 0.062  | 0.27   | 0.686  | 0.377  |
|                               | <i>r</i> | -0.002 | 0.007  | 0.123  | 0.162   | -0.032 | -0.142 | 0.044  | 0.141  |
| Shortened glands_UL           | <i>p</i> | 0.983  | 0.962  | 0.199  | 0.084   | 0.735  | 0.131  | 0.646  | 0.133  |
|                               | <i>r</i> | 0.029  | 0.019  | -0.04  | 0.093   | -0.028 | 0.107  | -0.138 | 0.008  |
| Shortened glands_LL           | <i>p</i> | 0.767  | 0.898  | 0.691  | 0.345   | 0.782  | 0.279  | 0.161  | 0.934  |
|                               | <i>r</i> | -0.063 | -.300* | -0.001 | 0.078   | -.198* | 0.032  | -0.011 | -0.065 |
| Overlapping glands_UL         | <i>p</i> | 0.507  | 0.032  | 0.993  | 0.41    | 0.036  | 0.736  | 0.91   | 0.491  |
|                               | <i>r</i> | -0.059 | -0.195 | 0.145  | -.264** | 0.104  | 0.031  | -0.074 | -0.122 |
| Overlapping glands_LL         | <i>p</i> | 0.551  | 0.195  | 0.147  | 0.006   | 0.296  | 0.758  | 0.455  | 0.216  |
|                               | <i>r</i> | -0.171 | -0.03  | -0.1   | -0.12   | 0.048  | -0.007 | 0.009  | -0.016 |
| Ghost glands_UL               | <i>p</i> | 0.068  | 0.836  | 0.295  | 0.201   | 0.612  | 0.943  | 0.928  | 0.863  |
|                               | <i>r</i> | -0.054 | 0.087  | 0.064  | -0.03   | -0.067 | 0.167  | -0.128 | -0.085 |
| Ghost glands_LL               | <i>p</i> | 0.586  | 0.566  | 0.523  | 0.762   | 0.502  | 0.091  | 0.197  | 0.388  |
|                               | <i>r</i> | -0.03  | -0.086 | 0.142  | -0.1    | -0.107 | 0.052  | -0.12  | 0.103  |
| Tadpoling_UL                  | <i>p</i> | 0.751  | 0.549  | 0.138  | 0.289   | 0.258  | 0.583  | 0.205  | 0.273  |
|                               | <i>r</i> | .222*  | -0.127 | 0.047  | 0.054   | -0.016 | 0.148  | -0.061 | -0.013 |
| Tadpoling_LL                  | <i>p</i> | 0.022  | 0.401  | 0.639  | 0.586   | 0.873  | 0.131  | 0.539  | 0.892  |
|                               | <i>r</i> | 0.047  | -0.266 | 0.011  | -0.147  | -0.154 | 0.064  | -0.139 | 0.103  |
| Abnormal gap_UL               | <i>p</i> | 0.618  | 0.059  | 0.909  | 0.117   | 0.103  | 0.496  | 0.14   | 0.273  |
|                               | <i>r</i> | -0.044 | 0.028  | 0.125  | -.223*  | -0.089 | -0.024 | 0.041  | -0.115 |
| Abnormal gap_LL               | <i>p</i> | 0.658  | 0.853  | 0.215  | 0.022   | 0.372  | 0.811  | 0.682  | 0.243  |
|                               | <i>r</i> | 0.169  | 0.096  | 0.048  | -0.072  | -0.071 | -0.011 | 0.169  | 0.022  |
| Fluffy areas_UL               | <i>p</i> | 0.07   | 0.504  | 0.614  | 0.444   | 0.454  | 0.91   | 0.072  | 0.815  |
|                               | <i>r</i> | 0.051  | -0.282 | 0.092  | -0.143  | -0.02  | -0.094 | 0.049  | -0.061 |
| Fluffy areas_LL               | <i>p</i> | 0.602  | 0.058  | 0.36   | 0.146   | 0.841  | 0.341  | 0.621  | 0.54   |
|                               | <i>r</i> | 0.096  | .      | 0.155  | -0.073  | -0.064 | -0.121 | 0.086  | 0.042  |
| No extention to lid margin_UL | <i>p</i> | 0.308  | .      | 0.105  | 0.436   | 0.502  | 0.2    | 0.364  | 0.655  |
|                               | <i>r</i> | -0.114 | -0.152 | 0.044  | -0.058  | 0.096  | 0.03   | 0.016  | -0.105 |

|                               |          |        |        |        |        |       |       |       |        |
|-------------------------------|----------|--------|--------|--------|--------|-------|-------|-------|--------|
| No extention to lid margin_LL | <i>p</i> | 0.247  | 0.314  | 0.663  | 0.554  | 0.337 | 0.764 | 0.871 | 0.287  |
|                               | <i>r</i> | -0.053 | -0.047 | -0.174 | -0.085 | 0.037 | 0.11  | 0.035 | -0.019 |
|                               | <i>p</i> | 0.571  | 0.741  | 0.067  | 0.368  | 0.697 | 0.242 | 0.709 | 0.841  |

UL= upper lids; LL= lower lids; TFBUT= tear film break-up time; OSS= ocular surface staining; ME= meibum expressibility; MQ= meibum quality; LMA= limbal margin abnormality score. \*P-values from Spearman rank correlation analysis.
